# Clustering of Cardiovascular Risk Factors Associated With the Insulin Resistance Syndrome

Assessment by principal component analysis in young hyperandrogenic women

M. ELISABETTA ZANOLIN, PHD<sup>1</sup>  
FLAVIA TOSI, MD<sup>2</sup>  
GIACOMO ZOPPINI, MD<sup>2</sup>  
ROBERTO CASTELLO, MD<sup>2</sup>

GIOVANNA SPIAZZI, MD<sup>2</sup>  
ROMOLO DORIZZI, MD<sup>2</sup>  
MICHELE MUGGEO, MD<sup>2</sup>  
PAOLO MOGHETTI, MD<sup>2</sup>

**OBJECTIVE** — Hyperinsulinemia is often associated with several metabolic abnormalities and increased blood pressure, which are risk factors for cardiovascular disease. It has been hypothesized that insulin resistance may underlie all these features. However, recent data suggest that some links between insulin resistance and these alterations may be indirect. The aim of our study was to further investigate this issue in a sample of young hyperandrogenic women, who often show insulin resistance and other metabolic abnormalities typical of the insulin resistance syndrome.

**RESEARCH DESIGN AND METHODS** — We tested the hypothesis of a single factor underlying these features by principal component analysis, which should recognize one component if a single mechanism explains this association. The analysis was carried out in a sample of 255 young nondiabetic hyperandrogenic women. Variables selected for this analysis included the basic features of the insulin resistance syndrome and some endocrine parameters related to hyperandrogenism.

**RESULTS** — Principal component analysis identified four separate factors, explaining 64.5% of the total variance in the data: the first included fasting and postchallenge insulin levels, BMI, triglycerides, HDL cholesterol, and uric acid; the second, BMI, blood pressure, and serum free testosterone; the third, fasting plasma glucose, postchallenge glucose and insulin levels, serum triglycerides, and free testosterone; and the fourth, postchallenge plasma insulin, serum free testosterone, and gonadotropin-releasing hormone agonist-stimulated 17-hydroxyprogesterone.

**CONCLUSIONS** — These results support the hypothesis of multiple determinants in the clustering of abnormalities in the so-called insulin resistance syndrome.

*Diabetes Care* 29:372–378, 2006

Many subjects show a clustering of metabolic abnormalities, suggesting that these alterations have shared pathogenetic mechanisms. These abnormalities include hyperglycemia, obesity, dyslipidemia, and hypertension, which are classical risk factors for cardiovascular disease (1–3). As impaired insulin

action is a common finding in these subjects, it has been hypothesized that insulin resistance and the associated hyperinsulinemia may be the common link among these alterations. Clustering of these abnormalities has been called insulin resistance syndrome, metabolic syndrome, or syndrome X. According to the

working definition recently proposed by the National Cholesterol Education Program Expert Panel (4), prevalence of the metabolic syndrome in the U.S. general population is as high as 20–25% (5).

The high prevalence and the serious implications of this condition indicate the need for an integrated preventive strategy. However, it remains unclear whether insulin resistance directly underlies all these features or whether some links are indirect, being mediated by other factors. A recent report by Meigs et al. (6) supported this latter hypothesis. These authors assessed, by factor analysis, clustering of cardiovascular risk variables in a large cohort of nondiabetic subjects of the Framingham Offspring Study. Their results were consistent with three different factors underlying the classical features of the insulin resistance syndrome: a central metabolic domain, comprising hyperinsulinemia, dyslipidemia, and obesity; a glucose intolerance domain, linked to the central domain through shared correlations with insulin levels; and a hypertension domain, linked to the central domain through BMI. However, it could be hypothesized that a multiple factor pattern emerges only in an advanced stage of the natural history of the syndrome and that in an earlier phase, when metabolic abnormalities are still subtle, the entire spectrum of alterations would appear directly linked to insulin resistance.

To further assess this issue, we tested the hypothesis of a single factor underlying features of syndrome X in a sample of young hyperandrogenic women. These subjects often show insulin resistance and other metabolic abnormalities typical of the insulin resistance syndrome (7–10). They thus represent a valuable model to study the relationships between metabolic abnormalities in a relatively early phase of their natural history. In many of these women, hyperandrogenism itself, especially ovarian hyperandrogenism, appears to be generated by hyperinsulinemia (7,11,12), suggesting that it is a

From the <sup>1</sup>Unit of Epidemiology and Medical Statistics, Department of Public Medicine and Health, University of Verona, Verona, Italy; and the <sup>2</sup>Division of Endocrinology and Metabolism, Department of Biomedical and Surgical Sciences, University of Verona, Verona, Italy.

Address correspondence and reprint requests to Prof. Paolo Moghetti, Divisione di Endocrinologia e Metabolismo, Ospedale Maggiore, P.le Stefani, 1, 37126 Verona, Italy. E-mail: moghetti@iol.it.

Received for publication 9 August 2005 and accepted 18 October 2005.

**Abbreviations:** DHEAS, dehydroepiandrosterone sulfate; GnRH, gonadotropin-releasing hormone.

A table elsewhere in this issue shows conventional and Système International (SI) units and conversion factors for many substances.

© 2006 by the American Diabetes Association.

The costs of publication of this article were defrayed in part by the payment of page charges. This article must therefore be hereby marked "advertisement" in accordance with 18 U.S.C. Section 1734 solely to indicate this fact.

component of the insulin resistance syndrome. Interestingly, polycystic ovary syndrome was recently included among the risk factors of the insulin resistance syndrome (13).

## RESEARCH DESIGN AND METHODS

Two hundred and fifty-five nondiabetic hyperandrogenic women, recruited from the outpatients referred to our division for hirsutism, acne, and/or hyperandrogenic oligoamenorrhea, were included in the study. All of them were Caucasian. In all women, androgen-secreting tumors, congenital adrenal hyperplasia, thyroid dysfunction, hyperprolactinemia, or Cushing's syndrome were ruled out. Hirsutism was defined as a score of eight or more on the Ferriman-Gallwey scale, as modified by Hatch et al. (14). Oligoamenorrhea was defined as menstrual intervals >6 weeks. Forty healthy women, with regular ovulatory cycles and normal serum androgens, served as control subjects. All women were studied in the early follicular phase (days 3–8) of the menstrual cycle or after at least 3 months of amenorrhea. No woman suffered from any other disease or was taking medications or oral contraceptives. Subjects gave their informed consent to the study, which was conducted in accordance with the Helsinki Declaration and approved by our local ethical committee.

The women had a complete physical examination and assessment of endocrine and metabolic profiles. Physical examination comprised assessment of height, weight, and blood pressure, which was measured by a mercury sphygmomanometer, with the subject in the sitting position, after at least 5 min of rest.

Baseline blood samples were collected at ~8:00 A.M., after overnight fasting, for measurements of serum free testosterone, dehydroepiandrosterone sulfate (DHEAS), gonadotropins, HDL cholesterol, triglycerides, and uric acid. Assessment included a 75-g oral glucose tolerance test, with plasma glucose and insulin measurements at 0, 30, 60, and 120 min.

In these women, a gonadotropin-releasing hormone (GnRH) agonist challenge was also carried out (15). An increased serum 17-hydroxyprogesterone response to GnRH agonist stimulation is considered a hallmark of ovarian hyperandrogenism (16,17). This test was carried out by subcutaneous injection of

**Table 1—Variables collected on the 255 women of the study and 40 healthy control subjects**

|                                                          | Median<br>(interquartile range) | Median<br>(interquartile range)<br>for 40 control subjects |
|----------------------------------------------------------|---------------------------------|------------------------------------------------------------|
| Age (years)                                              | 22 (20–26)                      | 24 (22.5–28.5)                                             |
| BMI (kg/m <sup>2</sup> )                                 | 23.2 (20.9–27)                  | 21.1 (20.1–26.2)                                           |
| Fasting plasma glucose (mmol/l)                          | 4.5 (4.2–4.8)                   | 4.8 (4.5–5.1)                                              |
| Postchallenge glucose (mmol/l)                           | 7.1 (6.2–8.1)                   | 7.0 (6.4–8.2)                                              |
| Fasting plasma insulin (pmol/l)                          | 79 (57–112)                     | 60 (43–79)                                                 |
| Postchallenge insulin (pmol/l)                           | 682 (450–1,177)                 | 479 (359–642)                                              |
| HDL cholesterol (mmol/l)                                 | 1.45 (1.28–1.74)                | 1.59 (1.30–2.03)                                           |
| Triglycerides (mmol/l)                                   | 0.88 (0.67–1.11)                | 0.75 (0.64–0.95)                                           |
| Uric acid (mmol/l)                                       | 0.27 (0.22–0.32)                | 0.23 (0.19–0.25)                                           |
| Systolic blood pressure (mmHg)                           | 120 (115–130)                   | 120 (110–130)                                              |
| Diastolic blood pressure (mmHg)                          | 75 (70–80)                      | 70 (65–80)                                                 |
| Free testosterone (pmol/l)                               | 7.4 (5.3–11.8)                  | 5.2 (3.5–6.2)                                              |
| DHEAS (ng/ml)                                            | 6.67 (4.72–8.36)                | 4.09 (2.59–5.75)                                           |
| Leutinizng hormone-to-follicle-stimulating hormone ratio | 1.13 (0.73–2.00)                | 0.75 (0.59–1.17)                                           |
| Stimulated 17-hydroxyprogesterone (nmol/l)               | 10.8 (7.5–15.4)                 | 5.5 (4.6–6.6)                                              |

0.1 mg buserelin (Suprefact; Hoechst Roussel, Milan, Italy). Twenty-four hours after drug administration, blood was drawn for assay of stimulated serum gonadotropins and 17-hydroxyprogesterone levels. All blood samples for hormonal assays were immediately centrifuged after withdrawal, and supernatant was separated and frozen at –20°C until assayed.

### Assays

Plasma glucose was assayed with a glucose-oxidase method in an automated analyzer (Beckman Instruments, Palo Alto, CA). Plasma insulin was measured by a specific immunoradiometric method, using a kit by Medgenix Diagnostics (Fleurus, Belgium), cross-reactivity with human proinsulin being <5%. Serum uric acid was measured by a commercial enzymatic method (Uricase-PAP) in an automatic analyzer. Serum steroids, gonadotropins, and lipids were assayed as previously described (18,19). All hormone measurements were performed in duplicate.

### Statistical analysis

Variables were selected according to the basic features of the insulin resistance syndrome (BMI, systolic and diastolic blood pressure, plasma glucose and insulin at fasting and after oral glucose, serum HDL cholesterol, triglycerides, and uric acid) (1,3). In the light of the specific characteristics of the population sample,

and of the recently proposed inclusion of ovarian androgen excess among features of the metabolic syndrome, some variables related to hyperandrogenism were also considered (free testosterone, DHEAS, leutinizng hormone-to-follicle-stimulating hormone ratio, and 17-hydroxyprogesterone after GnRH agonist stimulation). Associations between the considered variables were calculated by Pearson's correlation coefficients. When necessary, variables were log transformed to achieve normality of distribution.

We investigated the hypothesis of a single factor underlying the original variables by principal component analysis, which should recognize one component if a single mechanism explains this association. Principal component analysis was performed on the 255 hyperandrogenic women. This procedure is explained in detail in (6). Briefly, this analysis studies the correlations among several interrelated quantitative variables by grouping the variables into a few components. After grouping, the variables within each component are more highly correlated with variables in that component than with variables in other components. Variables weakly correlated to the others are not suitable for this kind of analysis.

The amounts of total variance attributable to the components are commonly known as "eigenvalues." They are the sum of the squared correlations between the original independent variables and the principal components. To avoid models

with an excessive number of factors, we excluded components with eigenvalues equal to or barely exceeding unity, i.e., we selected components with more variance of the original standardized variables. Usually, the initial component extraction is not interpretable. To produce interpretable components, the selected principal components were modified using the orthogonal varimax method. This procedure transforms the original components into other components uncorrelated with each other but highly correlated with unique subgroups of the studied variables. Factor loadings (correlations between the components and the original variables)  $> \pm 0.30$  were considered. Statistical analyses were carried out by SPSS 13.0 for Windows software (SPSS, Chicago, IL).

**RESULTS**— Table 1 shows the main characteristics of the study sample compared with healthy control subjects. As expected, serum free testosterone and DHEAS were higher in these women. Increased serum 17-hydroxyprogesterone after GnRH agonist stimulation was consistent with the ovarian origin of androgen excess in most of these subjects. These young hyperandrogenic women had increased insulin levels and presented subtle metabolic abnormalities commonly associated with the insulin resistance syndrome. Despite BMI being normal or slightly increased in most of these subjects, 17.3% (95% CI 12.8–22.5) met the criteria for insulin resistance syndrome (13).

For an initial evaluation of risk variable clustering, the correlation matrix between variables of interest was considered (Table 2). Serum DHEAS and leutinizing hormone-to-follicle-stimulating hormone ratio, weakly correlated with the vast majority of the variables, were excluded from the following analyses. Free testosterone and postchallenge 17-hydroxyprogesterone, variables related to hyperandrogenism, were both correlated with several metabolic features.

Principal components analysis identified four dominant factors, explaining 64.5% of the total variance in the data. Factor loading patterns, after orthogonal rotation of the correlation matrix, are shown in Table 3. The first factor included fasting and postchallenge insulin levels, BMI, HDL cholesterol, triglycerides, and uric acid; the second, BMI, blood pressure, and free testosterone; the

Table 2—Pearson's correlation coefficients among the variables of interest

|                          | Fasting glucose | OGTT: glucose | Fasting insulin | OGTT: insulin | BMI    | HDL cholesterol | Triglycerides | Uric acid | Diastolic blood pressure | Systolic blood pressure | Free testosterone | DHEAS | Ln (stimulated 17OHP) |
|--------------------------|-----------------|---------------|-----------------|---------------|--------|-----------------|---------------|-----------|--------------------------|-------------------------|-------------------|-------|-----------------------|
| OGTT: glucose            | 0.54*           | —             |                 |               |        |                 |               |           |                          |                         |                   |       |                       |
| Fasting insulin          | 0.27*           | 0.16†         | —               |               |        |                 |               |           |                          |                         |                   |       |                       |
| OGTT: insulin            | 0.25*           | 0.38*         | 0.59*           | —             |        |                 |               |           |                          |                         |                   |       |                       |
| BMI                      | 0.30*           | 0.24*         | 0.46*           | 0.31*         | —      |                 |               |           |                          |                         |                   |       |                       |
| HDL cholesterol          | -0.18†          | -0.12         | -0.23*          | -0.19†        | -0.23* | —               |               |           |                          |                         |                   |       |                       |
| Triglycerides            | 0.26†           | 0.29†         | 0.37†           | 0.43†         | 0.32†  | -0.27†          | —             |           |                          |                         |                   |       |                       |
| Uric acid                | 0.04            | 0.09          | 0.40*           | 0.34*         | 0.44*  | -0.13†          | 0.24*         | —         |                          |                         |                   |       |                       |
| Diastolic blood pressure | 0.13†           | 0.19†         | 0.35*           | 0.32*         | 0.42*  | -0.15†          | 0.34*         | 0.39*     | —                        |                         |                   |       |                       |
| Systolic blood pressure  | 0.23*           | 0.22*         | 0.32*           | 0.29*         | 0.41*  | -0.08           | 0.29*         | 0.20*     | 0.69*                    | —                       |                   |       |                       |
| Free testosterone        | 0.20*           | 0.25*         | 0.21*           | 0.30*         | 0.27*  | -0.15†          | 0.27*         | 0.16†     | 0.36*                    | 0.41*                   | —                 |       |                       |
| DHEAS                    | 0.04            | 0.06          | 0.11            | 0.06          | -0.10  | -0.04           | -0.05         | 0.06      | -0.04                    | 0.10                    | 0.26*             | —     |                       |
| Ln(stimulated 17OHP)     | -0.04           | 0.12          | 0.21*           | 0.25*         | 0.01   | 0.02            | 0.18†         | 0.30*     | 0.38*                    | 0.18†                   | 0.36*             | 0.10  | —                     |
| LH/FSH ratio             | 0.07            | 0.09          | 0.04            | 0.08          | -0.08  | 0.05            | 0.04          | 0.05      | 0.18†                    | 0.10                    | 0.28*             | -0.06 | 0.41*                 |

\*  $P < 0.001$ ; †  $0.01 < P < 0.05$ ; ‡  $0.001 < P < 0.01$ . Stimulated 17OHP, 17-hydroxyprogesterone after GnRH agonist test. LH/FSH, leutinizing hormone-to-follicle-stimulating hormone; OGTT, oral glucose tolerance test.

Table 3—Loadings of principal components after orthogonal rotation

|                                         | Components                        |                 |                        |                     |
|-----------------------------------------|-----------------------------------|-----------------|------------------------|---------------------|
|                                         | 1: core of the metabolic syndrome | 2: hypertension | 3: glucose intolerance | 4: hyperandrogenism |
| Fasting plasma glucose                  | 0.16                              | 0.14            | <b>0.79</b>            | −0.19               |
| Postchallenge glucose                   | 0.11                              | 0.09            | <b>0.83</b>            | 0.13                |
| Fasting plasma insulin                  | <b>0.77</b>                       | 0.17            | 0.13                   | 0.10                |
| Postchallenge insulin                   | <b>0.65</b>                       | 0.06            | <b>0.36</b>            | <b>0.34</b>         |
| BMI                                     | <b>0.56</b>                       | <b>0.53</b>     | 0.13                   | −0.28               |
| HDL cholesterol                         | <b>−0.49</b>                      | −0.02           | −0.17                  | 0.26                |
| Triglycerides                           | <b>0.51</b>                       | 0.17            | <b>0.36</b>            | 0.15                |
| Uric acid                               | <b>0.67</b>                       | 0.24            | −0.22                  | 0.23                |
| Diastolic blood pressure                | 0.28                              | <b>0.80</b>     | 0.01                   | 0.24                |
| Systolic blood pressure                 | 0.11                              | <b>0.88</b>     | 0.16                   | 0.05                |
| Free testosterone                       | 0.06                              | <b>0.50</b>     | <b>0.33</b>            | <b>0.41</b>         |
| Ln(stimulated 17-hydroxyprogesterone)*  | 0.14                              | 0.17            | −0.02                  | <b>0.87</b>         |
| Cumulative percentage of total variance | 33.9                              | 46.1            | 55.9                   | 64.5                |

The values show the correlation of each variable with the corresponding component: variables with greater loadings characterize that specific component. Cumulative percentages of total variance are also shown. Loadings  $\geq 0.30$  are in bold type. \*After GnRH agonist challenge.

third, fasting and postchallenge plasma glucose, postchallenge insulin levels, triglycerides, and free testosterone; and the fourth, postchallenge insulin, free testosterone, and stimulated 17-hydroxyprogesterone.

These results obtained in hyperandrogenic women support the hypothesis of multiple determinants in the clustering of the abnormalities in the so-called insulin resistance syndrome. In particular, our data suggest a main component including several metabolic features (insulin levels, BMI, serum HDL cholesterol, triglycerides, and uric acid). The second and the third components included variables related to other metabolic abnormalities commonly associated with insulin resistance, such as those concerning, respectively, blood pressure and glucose tolerance, with the addition in both of serum free testosterone. The fourth component was mainly formed by features of ovarian hyperandrogenism, with the noticeable presence of postchallenge plasma insulin.

**CONCLUSIONS**— The clustering of insulin resistance and associated hyperinsulinemia with body fat excess, hypertension, and several other metabolic abnormalities (glucose intolerance, dyslipidemia, and hyperuricemia) has been consistently reported and has been called syndrome X, metabolic syndrome, or the insulin resistance syndrome (1–3). It was hypothesized that insulin resistance might be the single underlying mechanism generating all these abnormalities

(2). However, these associations could also be due to the clustering of separate components connected by shared elements. This hypothesis was recently supported by the findings of Meigs et al. (6) in the Framingham Offspring Study. Nevertheless, it cannot be excluded that a multiple factor pattern emerges only at an advanced stage of the natural history of the syndrome. In an earlier phase, all features could be still attributed to the presumed ultimate cause, i.e., insulin resistance.

Insulin resistance is also associated with hyperandrogenism, especially in women with the polycystic ovary syndrome (7,11,12,20). Interestingly, these women often show multiple metabolic abnormalities typical of syndrome X. In particular, several authors consistently reported hyperinsulinemia, obesity, altered glucose tolerance, and dyslipidemia in many of these subjects (7–10,21–23). In addition, some studies found increased blood pressure in polycystic ovary syndrome subjects (24–28). These alterations in hyperandrogenic women are usually attributed to impaired insulin action, although direct effects of androgen excess cannot be ruled out.

For these reasons, hyperandrogenic subjects may be considered as a useful model to assess the relationships among the elements included in the insulin resistance syndrome. We thus studied a sample of these women to further test the hypothesis of an underlying common mechanism generating the overall meta-

bolic dysfunction. The principal components analysis was used to identify main clusters of variables. A single major component would have been identified if insulin resistance was the single underlying factor. Interestingly, in these young women metabolic abnormalities were mild. The prevalence of the insulin resistance syndrome was substantially lower than in other studies concerning this issue carried out in hyperandrogenic women (29,30), although it was about three times higher than in the age-matched general population (5). These characteristics of our sample allow us to model the early effects of insulin resistance, avoiding the confounding influences of overt metabolic changes. As ovarian hyperandrogenism itself could be considered a feature of the insulin resistance syndrome, the model included some specific endocrine characteristics.

Four components were identified by the analysis. The central component comprised insulin levels together with BMI, HDL cholesterol, triglycerides, and uric acid. This suggests that, among metabolic abnormalities, obesity, dyslipidemia, and hyperuricemia were directly associated with insulin resistance.

Blood pressure was indirectly linked to the central component through BMI. The indirect relationship between hypertension and insulin resistance is supported by the discordant findings of previous studies. While some authors reported that hypertension was associated with hyperinsulinemia (31–34), others

did not (35–38). Interestingly, this association seems to be more common in obese subjects.

In this population of hyperandrogenic women, BMI and blood pressure were also linked to free testosterone levels. In this regard, inclusion of these features in the same component prompts a number of considerations. Obesity is a common finding in women with ovarian hyperandrogenism (39), although the mechanisms underlying this relationship remain largely undetermined. Fat excess may influence sex hormone metabolism both directly (40) and indirectly by impairing insulin action (41). On the other hand, either androgens or glucocorticoid hormones, which could be both oversecreted in many hyperandrogenic subjects, might favor fat accumulation, particularly in central body sites (42). The few studies assessing blood pressure in hyperandrogenic subjects have yielded different results (24–28,43,44). These discrepancies are not easily explained. Interestingly, some studies reported increased blood pressure only in obese polycystic ovary syndrome women (26–28).

The composition of the third component, including fasting and postload plasma glucose, postload plasma insulin, serum triglycerides, and free testosterone, suggests that glucose tolerance is also distinct from the central component, being linked to it by post-oral glucose tolerance test insulin levels and serum triglycerides. This is consistent on the one hand with the evidence that both insulin resistance and impaired  $\beta$ -cell function contribute to glucose intolerance (45) and on the other hand with the association between hypertriglyceridemia and hyperglycemia (42).

These findings are consistent with those reported by Meigs et al. (6) in the Framingham Offspring Study. These authors performed principal components analysis on main features of the insulin resistance syndrome in a large sample of nondiabetic subjects. In this study, three components were identified: a central component (fasting and postchallenge insulin, BMI, triglycerides, HDL cholesterol, and waist-to-hip ratio), including all the variables of our first component shared by the two studies; an impaired glucose tolerance component (fasting and postchallenge insulin and glucose); and a hypertension component (BMI and blood pressure). These latter components as well substantially matched our results.

It should be noticed that there are re-

markable differences between the two samples, as our study included only young hyperandrogenic women, while Meigs's study was carried out on the middle-aged general population of both sexes. Mean BMI and serum lipids were also somewhat different between the two studies. Furthermore, environmental and dietary habits were likely different in Framingham, MA, and Verona, Italy. The very similar results obtained in the two studies, in spite of these differences, strongly support the hypothesis of distinct components in the insulin resistance syndrome. Evidence that young subjects with mild alterations also show separate components in the metabolic syndrome indicates that a multiple factor pattern is already present at an early stage in the natural history of the syndrome, suggesting that this pattern is primitive.

In addition, our study identified a hyperandrogenic component. This component comprised serum free testosterone and GnRH agonist-stimulated 17-hydroxyprogesterone, a hallmark of ovarian hyperandrogenism, linked to the central component by post-oral glucose tolerance test insulin levels. This finding is attributable to the inclusion of additional variables in our sample and to its unique characteristics. The fact that insulin and ovarian androgens gather together is not surprising, as there is evidence of a bidirectional link between hyperinsulinemia and free androgen levels: hyperinsulinemia is thought to stimulate androgen production (7,11,46–48) and also increases testosterone bioavailability by reducing sex hormone-binding globulin synthesis in the liver (49,50). On the other hand, androgen excess in turn seems to impair insulin action (18,51–53). Interestingly, an association between serum free androgens and the metabolic syndrome was recently found also in postmenopausal women (54).

In conclusion, in a sample of hyperandrogenic women, principal components analysis of cardiovascular risk variables associated with insulin resistance identified multiple components. These data are consistent with previous results in the general population, supporting the hypothesis that insulin resistance alone does not underlie the whole expression of the metabolic syndrome. In addition, these findings support the hypothesis that in women free androgen excess is a feature of the metabolic syndrome.

## References

1. Reaven GM: Role of insulin resistance in human diseases. *Diabetes* 37:1595–607, 1988
2. DeFronzo RA, Ferrannini E: Insulin resistance: a multifaceted syndrome responsible for NIDDM, obesity, hypertension, dyslipidemia and atherosclerotic cardiovascular disease. *Diabetes Care* 14: 173–194, 1991
3. Haffner SM, Valdez RA, Hazuda HP, Mitchell BD, Morales PA, Stern MP: Prospective analysis of the insulin resistance syndrome (syndrome X). *Diabetes* 41: 715–722, 1992
4. Expert Panel on Detection, Evaluation, and Treatment of High Blood Cholesterol in Adults: Executive summary of the third report of the National Cholesterol Education Program (NCEP) Expert Panel on Detection, Evaluation, and Treatment of High Blood Cholesterol in Adults (Adult Treatment Panel III). *JAMA* 285:2486–2497, 2001
5. Ford ES, Giles WH, Dietz WH: Prevalence of the metabolic syndrome among US adults: finding from the Third National Health and Nutrition Examination Survey. *JAMA* 287:356–359, 2002
6. Meigs JB, D'Agostino RB, Wilson PWF, Cupples LA, Nathan DM, Singer DE: Risk variable clustering in the insulin resistance syndrome. *Diabetes* 46:1594–1600, 1997
7. Dunaif A: Insulin resistance and the polycystic ovary syndrome: mechanism and implications for pathogenesis. *Endocr Rev* 18:774–800, 1997
8. Lobo RA, Carmina E: The importance of diagnosing the polycystic ovary syndrome. *Ann Intern Med* 132:989–993, 2000
9. Wild RA: Polycystic ovary syndrome: a risk for coronary artery disease? *Am J Obstet Gynecol* 186:35–43, 2002
10. Ovalle F, Azziz R: Insulin resistance, polycystic ovary syndrome, and type 2 diabetes mellitus. *Fertil Steril* 77:1095–1105, 2002
11. Poretsky L, Cataldo NA, Rosenwaks Z, Giudice LC: The insulin-related ovarian regulatory system in health and disease. *Endocr Rev* 20:535–582, 1999
12. Nestler JE: Insulin resistance and the polycystic ovary syndrome: recent advances. *Curr Opin Endocrinol Diabetes* 7:345–349, 2000
13. Einhorn DP, Reaven GM, Cobin RH, Ford E, Ganda OP, Handelsman Y, Hellman R, Jellinger PS, Kendall D, Krauss RM, Neufeld ND, Petak SM, Rodbard HW, Seibel JA, Smith DA, Wilson PW: American College of Endocrinology position statement on the insulin resistance syndrome. *Endocr Pract* 9:237–252, 2003
14. Hatch R, Rosenfield RL, Kim MH, Tredway D: Hirsutism: implications, etiology,

- and management. *Am J Obstet Gynecol* 140:815–830, 1981
15. Barnes RB, Rosenfield RL, Burstein S, Ehrmann DA: Pituitary-ovarian responses to nafarelin testing in the polycystic ovary syndrome. *N Engl J Med* 320:559–565, 1989
  16. Rosenfield RL, Ehrmann DA, Barnes RB, Sheikh Z: Gonadotropin-releasing hormone agonist as a probe for the pathogenesis and diagnosis of ovarian hyperandrogenism. *Ann N Y Acad Sci* 687:162–181, 1993
  17. Ehrmann DA, Barnes RB, Rosenfield RL: Polycystic ovary syndrome as a form of functional ovarian hyperandrogenism due to dysregulation of androgen secretion. *Endocr Rev* 16:322–369, 1995
  18. Moghetti P, Tosi F, Castello R, Magnani CM, Negri C, Brun E, Furlani L, Caputo M, Muggeo M: The insulin resistance in women with hyperandrogenism is partially reversed by antiandrogen treatment: evidence that androgens impair insulin action in women. *J Clin Endocrinol Metab* 81:952–960, 1996
  19. Travia D, Tosi F, Negri C, Faccini G, Moghetti P, Muggeo M: Sustained therapy with 3-hydroxy-3-methylglutaryl-coenzyme A reductase inhibitors does not impair steroidogenesis by adrenals and gonads. *J Clin Endocrinol Metab* 80:836–840, 1995
  20. Moghetti P, Castello R: New routes in the polycystic ovary syndrome labyrinth: a way out? *J Endocrinol Invest* 21:648–655, 1998
  21. Wild RA: Obesity, lipids, cardiovascular risk, and androgen excess. *Am J Med* 98 (Suppl. 1A):27S–32S, 1995
  22. Robinson S, Henderson AD, Gelding SV, Kiddy D, Niththyananthan R, Bush A, Richmond W, Johnston DG, Franks S: Dyslipidaemia is associated with insulin resistance in women with polycystic ovaries. *Clin Endocrinol* 44:277–284, 1996
  23. Legro RS: Polycystic ovary syndrome and cardiovascular disease: a premature association? *Endocr Rev* 24:302–312, 2003
  24. Holte J, Gennarelli G, Berne C, Bergh T, Lithell H: Elevated ambulatory day-time pressure in women with polycystic ovary syndrome: a sign of a pre-hypertensive state? *Hum Reprod* 11:23–28, 1996
  25. Dahlgren E, Johansson S, Lindstedt G, Knutsson F, Oden A, Janson PO, Mattson LA, Crona N, Lundberg PA: Women with polycystic ovary syndrome wedge resected in 1956 to 1965: a long-term follow-up focusing on natural history and circulating hormones. *Fertil Steril* 57:505–513, 1992
  26. Talbott E, Guzick D, Clerici A, Berga S, Detre K, Weimer K, Kuller L: Coronary heart disease risk factors in women with polycystic ovary syndrome. *Arterioscler Thromb Vasc Biol* 15:821–826, 1995
  27. Conway GS, Agrawal R, Betteridge DJ, Jacobs HS: Risk factors for coronary artery disease in lean and obese women with polycystic ovary syndrome. *Clin Endocrinol* 37:119–125, 1992
  28. Wild RA, Alaupovic P, Parker IJ: Lipid and apolipoprotein abnormalities in hirsute women. I. The association with insulin resistance. *Am J Obstet Gynecol* 166:1191–1197, 1992
  29. Glueck CJ, Papanna R, Wang P, Goldenberg N, Sieve-Smith L: Incidence and treatment of metabolic syndrome in newly referred women with confirmed polycystic ovarian syndrome. *Metabolism* 52:908–915, 2003
  30. Apridonidze T, Essah PA, Iuorno MJ, Nestler JE: Prevalence and characteristics of the metabolic syndrome in women with polycystic ovary syndrome. *J Clin Endocrinol Metab* 90:1929–1935, 2005
  31. Bonora E, Kiechl S, Willeit J, Oberhollenzer F, Egger G, Targher G, Alberiche M, Bonadonna RC, Muggeo M: Prevalence of insulin resistance in metabolic disorders: the Bruneck Study. *Diabetes* 47:1643–1649, 1998
  32. Ferrannini E, Buzzigoli G, Bonadonna R, Giorico MA, Graziadei L, Pedrinelli R, Brandi L, Bevilacqua S: Insulin resistance in essential hypertension. *N Engl J Med* 317:350–357, 1987
  33. Zavaroni I, Bonora E, Pagliara M, Dall'Aglio E, Luchetti L, Buonanno G, Bonati PA, Bergonzani M, Gnudi L, Passeri M, Reaven G: Risk factors for coronary artery disease in healthy persons with hyperinsulinemia and normal glucose tolerance. *N Engl J Med* 320:502–506, 1989
  34. Falkner B, Hulman D, Tannebaum J, Kushner H: Insulin resistance and blood pressure in young black men. *Hypertension* 16:706–711, 1990
  35. Mbanya JCN, Thomas TH, Wilkinson R, Alberti KGMM, Taylor R: Hypertension and hyperinsulinemia: a relation in diabetics but not in essential hypertension. *Lancet* 1:733–734, 1988
  36. Saad MF, Lillioja S, Nyomba BL, Castillo C, Ferraro R, DeGregorio M, Ravussin E, Knowler WC, Bennett PH, Howard BV, Bogardus C: Racial differences in the relationship with blood pressure and insulin resistance. *N Engl J Med* 324:733–739, 1991
  37. Muller DC, Elahi D, Pratley RE, Tobin JD, Andres R: An epidemiological test of the hyperinsulinemia-hypertension hypothesis. *J Clin Endocrinol Metab* 76:544–548, 1993
  38. Haffner SM, Ferrannini E, Hazuda HP, Stern MP: Clustering of cardiovascular risk factors in confirmed prehypertensive individuals. *Hypertension* 20:38–45, 1992
  39. Franks S, Kiddy D, Sharp P, Singh A, Reed M, Seppala M, Koistinen R, Hamilton-Fairley D: Obesity and polycystic ovary syndrome. *Ann N Y Acad Sci* 626:201–206, 1991
  40. Pasquali R, Casimirri F: The impact of obesity on hyperandrogenism and polycystic ovary syndrome in premenopausal women. *Clin Endocrinol (Oxf)* 39:1–16, 1993
  41. Holte J: Polycystic ovary syndrome and insulin resistance: thrifty genes struggling with over-feeding and sedentary life style? *J Endocrinol Invest* 21:589–601, 1998
  42. Brown WV: Lipoprotein disorders in diabetes mellitus. *Med Clin North Am* 78:143–161, 1994
  43. Zimmermann S, Phillips RA, Dunaif A, Finnegood DT, Wilkenfeld C, Ardeljan M, Gorlin R, Krakoff LR: Polycystic ovary syndrome: lack of hypertension despite profound insulin resistance. *J Clin Endocrinol Metab* 75:508–513, 1992
  44. Sampson M, Kong C, Patel A, Unwin R, Jacobs HS: Ambulatory blood pressure profiles and plasminogen activator inhibitor (PAI-1) activity in lean women with and without the polycystic ovary syndrome. *Clin Endocrinol* 45:623–629, 1996
  45. DeFronzo RA: The triumvirate: beta-cell, muscle, liver: a collusion responsible for NIDDM. *Diabetes* 37:667–687, 1988
  46. Barbieri RL, Makris A, Randall RW, Daniels G, Kristner RW, Ryan KJ: Insulin stimulates androgen accumulation in incubations of ovarian stroma obtained from women with hyperandrogenism. *J Clin Endocrinol Metab* 62:904–910, 1986
  47. Nestler JE, Jakubowicz DJ, De Vargas AF, Brik C, Quintero N, Medina F: Insulin stimulates testosterone biosynthesis by human thecal cells from women with polycystic ovary syndrome by activating its own receptor and using inositolglycan mediators as the signal transduction system. *J Clin Endocrinol Metab* 83:2001–2005, 1998
  48. Moghetti P, Castello R, Negri C, Tosi F, Spiazzi GG, Brun E, Balducci R, Toscano V, Muggeo M: Insulin infusion amplifies 17 $\alpha$ -hydroxycorticosteroid intermediates response to adrenocorticotropin in hyperandrogenic women: apparent relative impairment of 17,20-lyase activity. *J Clin Endocrinol Metab* 81:881–886, 1996
  49. Nestler JE, Powers LP, Matt DW: A direct effect of hyperinsulinemia on serum sex hormone-binding globulin levels in obese women with the polycystic ovary syndrome. *J Clin Endocrinol Metab* 72:83–89, 1991
  50. Plymate SR, Matej LA, Jones RE: Inhibition of sex hormone-binding globulin production in the human hepatoma (Hep G2) cell line by insulin and prolactin. *J Clin Endocrinol Metab* 67:460–464, 1988
  51. Holmang A, Svedberg J, Jennische E, Bjornorp P: Effects of testosterone on muscle insulin sensitivity and morphology in female rats. *Am J Physiol* 259:E555–E560, 1990
  52. Speiser PW, Serrat J, New MI, Gertner JM:

## Risk factors clustering in hyperandrogenism

- Insulin insensitivity in adrenal hyperplasia due to nonclassical steroid 21-hydroxylase deficiency. *J Clin Endocrinol Metab* 75:1421–1424, 1992
53. Diamond MP, Grainger D, Diamond MC, Sherwin RS, DeFronzo RA: Effects of methyltestosterone on insulin secretion and sensitivity in women. *J Clin Endocrinol Metab* 83:4420–4425, 1998
54. Golden SH, Ding J, Szklo M, Schmidt MI, Duncan BB, Dobs A: Glucose and insulin components of the metabolic syndrome are associated with hyperandrogenism in postmenopausal women. *Am J Epidemiol* 160:540–548, 2004
